# Supplementary material for: “Scratch it out”: carbon copy based paper devices for microbial assays and liver disease diagnosis
Source: Royal Society of Chemistry journal article supplement (doi:10.1039/d1ay00764e), 2021-01-01
Supplement: d1ay00764e1.pdf [file d1ay00764e1.pdf]

## “Scratch it out”: Carbon-copy based Paper devices for microbial assays and liver disease diagnosis.

Amrutha Hasandka<sup>a±</sup>, Anusha Prabhu<sup>a±</sup>, Akshata Prabhu<sup>a±</sup>, Hardik Ramesh Singhal<sup>b±</sup>, Giri Nandagopal M S<sup>c</sup>, Revathi Shenoy<sup>d</sup>, Naresh Kumar Mani<sup>a,e\*</sup>

### Paper-based origami device fabricated using Carbon copy

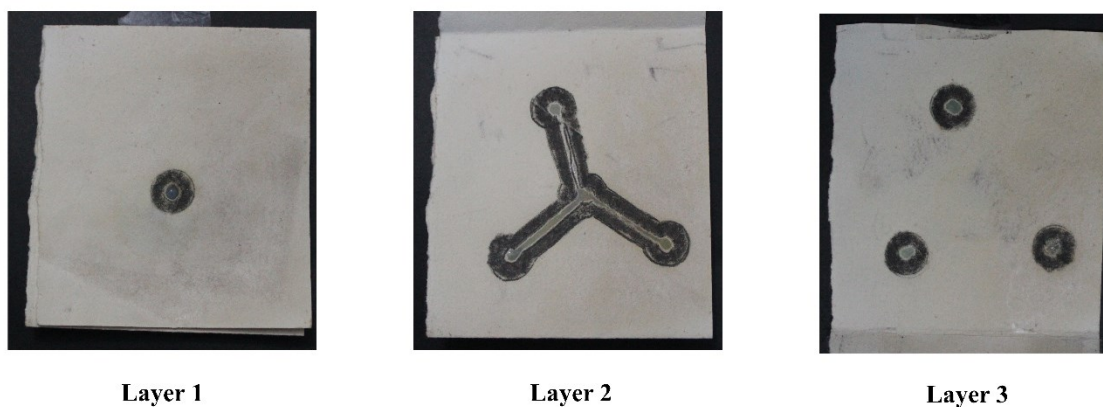

Supplementary figure 1: Paper-based origami device fabricated using carbon-copy approach with water sample confined inside the circular device & channel.

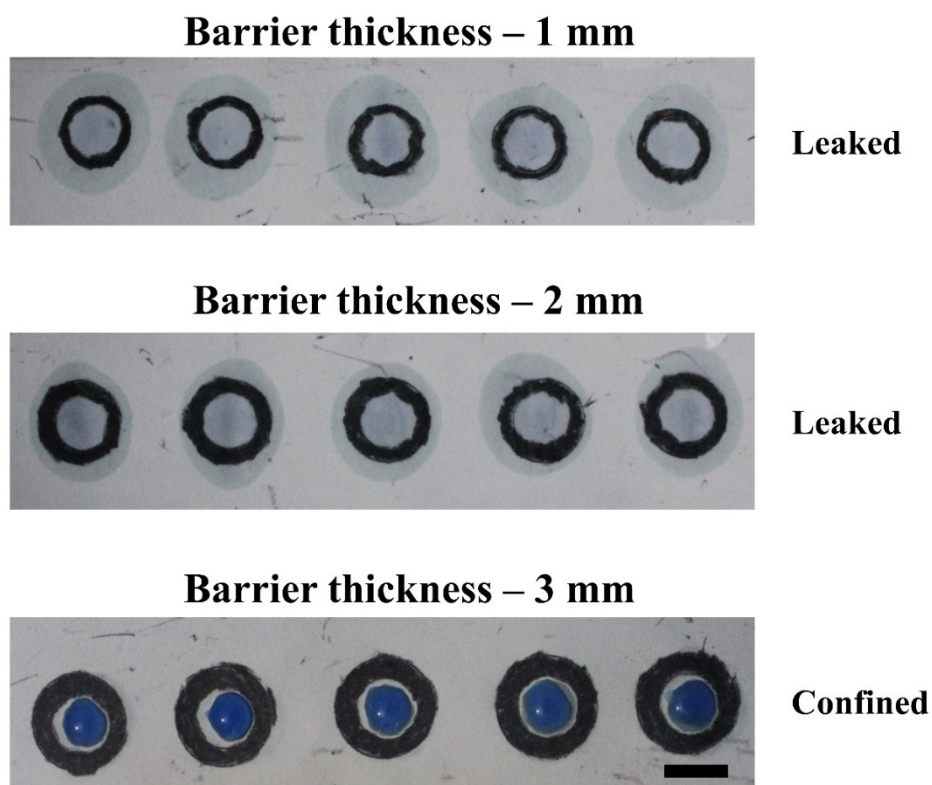

Supplementary figure 2: Circular devices with different barrier thickness (Top 1 mm, Middle 2 mm, Bottom 3 mm). Scale bar 8 mm

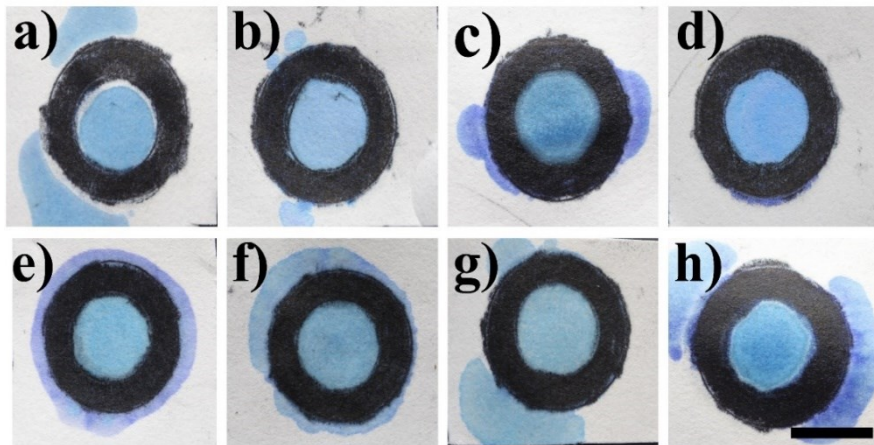

Supplementary figure 3: Barrier disruption using non-polar solvents and surfactants (a) 50% Ethanol (b) 70% Ethanol (c) DMSO (d) Acetone (e) IPA (f) 1% SDS (g) 1% Triton-X-100 (h)Dimethyl formamide. Scale bar 8 mm.

**Carbon Copy**  
(All units are in mm)

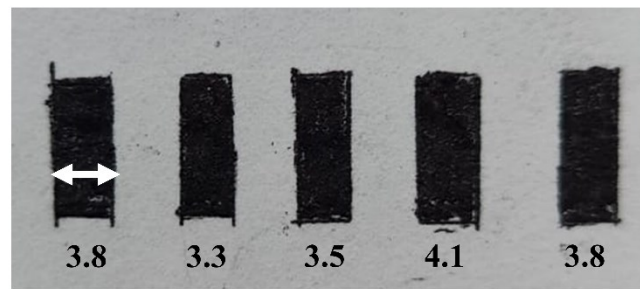

**Correction Pen**

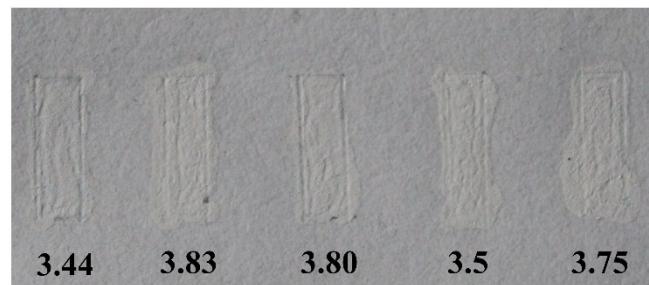

**Nail Polish**

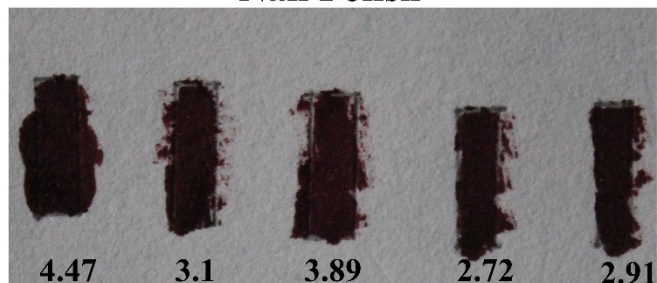

Supplementary figure 4: Barriers fabricated using Carbon copy, Correction Pen and Nail polish with their respective barrier width.
